# Supplementary material for: Ultrasensitive simultaneous detection of ascorbic acid, dopamine, uric acid and acetaminophen on a graphitized porous carbon-modified electrode
Source: Royal Society of Chemistry journal article supplement (doi:10.1039/d0nj04806b), 2020-12-10
Supplement: d0nj04806b1.pdf [file d0nj04806b1.pdf]

## Supporting Information

# Ultrasensitive simultaneous detection of ascorbic acid, dopamine, uric acid and acetaminophen on a graphitized porous carbon- modified electrode

**Velu Duraisamy<sup>a,b</sup>, Velayutham Sudha<sup>a,b</sup>, Kuppusamy Annadurai<sup>a,b</sup>, Sakkarapalayam**

**Murugesan Senthil Kumar<sup>a,b,\*</sup>, Rangasamy Thangamuthu<sup>a,b</sup>**

<sup>a</sup>Electroorganic and Materials Electrochemistry (EME) Division, CSIR-Central Electrochemical Research Institute (CECRI), Karaikudi-630 003, Tamil Nadu, India.

<sup>b</sup>Academy of Scientific and Innovative Research (AcSIR), Ghaziabad-201 002, India.

\*To whom correspondence should be addressed. E-mail: [smsk\\_2k@yahoo.com](mailto:smsk_2k@yahoo.com);  
[senthilkumarsm@cecri.res.in](mailto:senthilkumarsm@cecri.res.in); Phone: +91-04565-241-479.

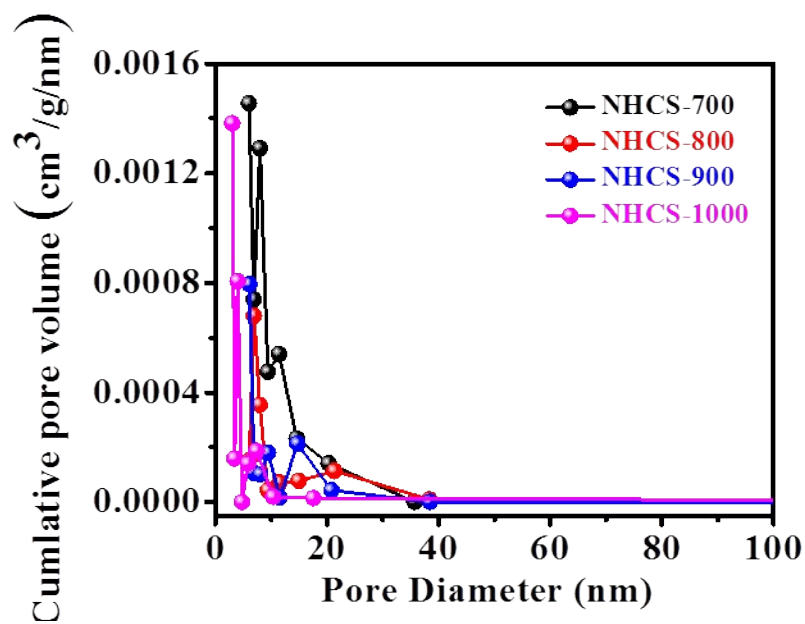

**Figure S1.** Pore size distribution curves analysis from Barrett–Joyner–Halenda method of NHCS-700, NHCS-800, NHCS-900 and NHCS-1000 samples.

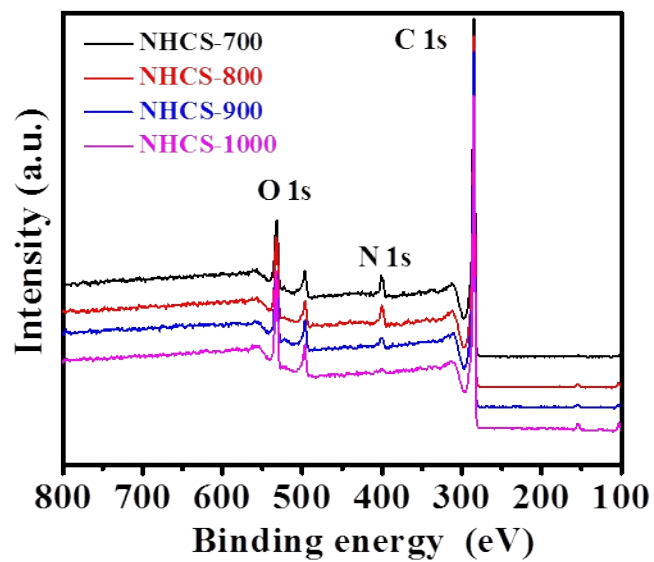

**Figure S2.** XPS survey spectrum of NHCS-700, NHCS-800, NHCS-900 and NHCS-1000 samples in the range of 100-800 eV.

**Table S1.** The carbon, nitrogen and oxygen atomic percentages of NHCS-700, NHCS-800, NHCS-900 and NHCS-1000 samples.

| <b>S. No</b> | <b>N-doped hollow carbon samples</b> | <b>Carbon (C) 285 eV (atomic %)</b> | <b>Nitrogen (N) 401 eV (atomic %)</b> | <b>Oxygen (O) 532 eV (atomic %)</b> |
|--------------|--------------------------------------|-------------------------------------|---------------------------------------|-------------------------------------|
| <b>1</b>     | NHCS-700                             | 86.86                               | 4.69                                  | 8.45                                |
| <b>2</b>     | NHCS-800                             | 85.88                               | 4.56                                  | 9.56                                |
| <b>3</b>     | NHCS-900                             | 88.47                               | 2.91                                  | 8.62                                |
| <b>4</b>     | NHCS-1000                            | 87.12                               | 1.24                                  | 11.64                               |

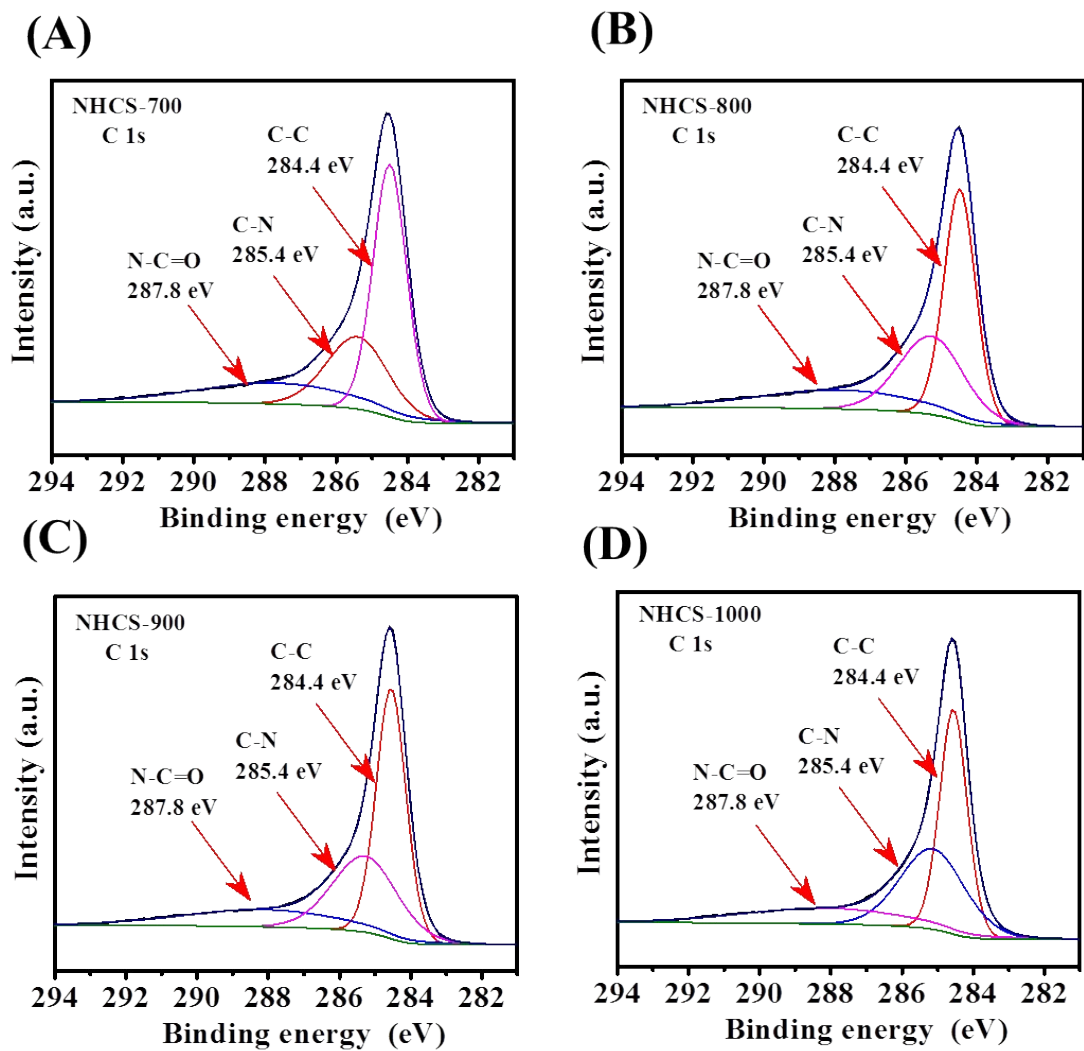

**Figure S3.** C 1s spectra of (A) NHCS-700, (B) NHCS-800, (C) NHCS-900 and (D) NHCS-1000 samples in the range of 294-281 eV.

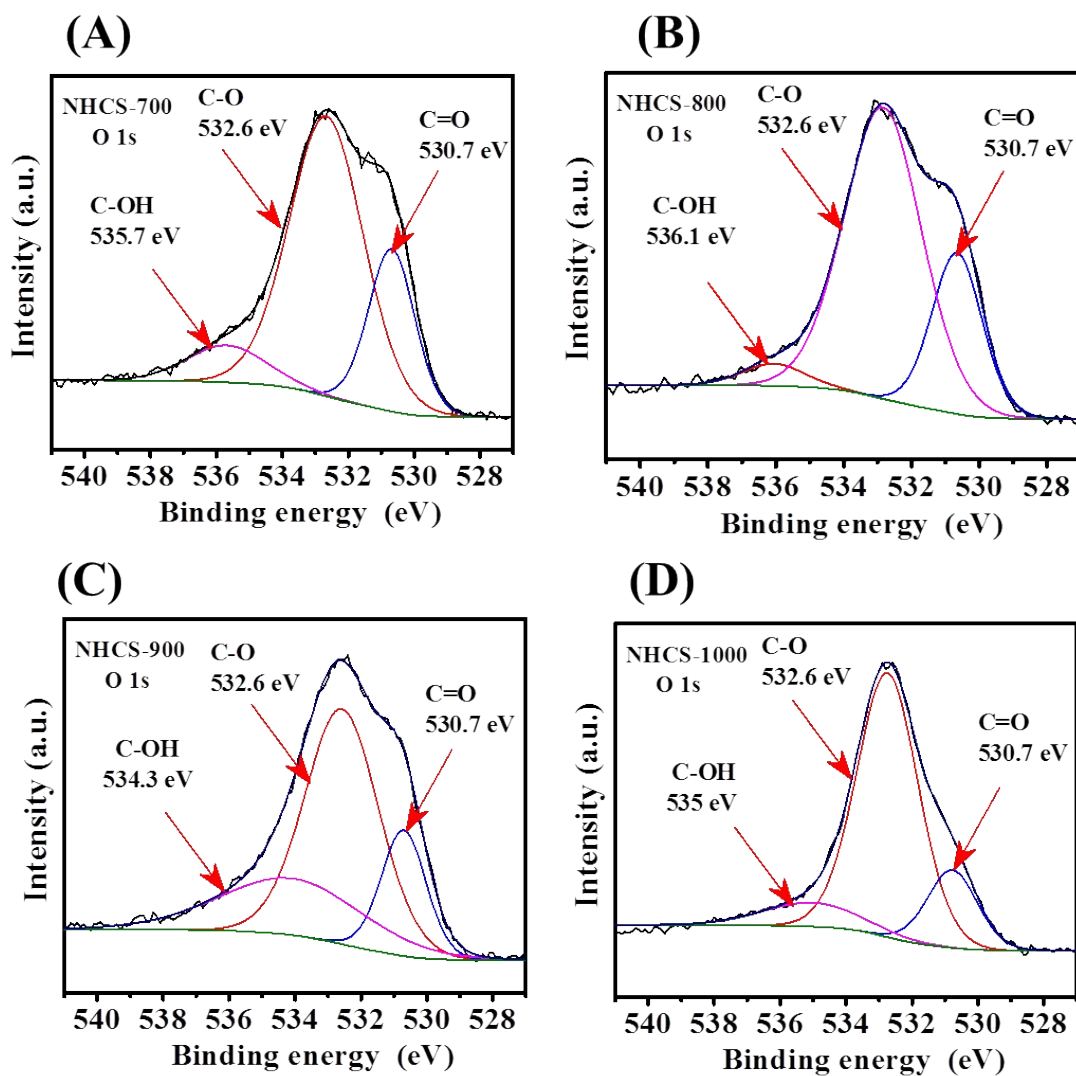

**Figure S4.** O 1s spectra of (A) NHCS-700, (B) NHCS-800, (C) NHCS-900 and (D) NHCS-1000 samples in the range of 541-527 eV.

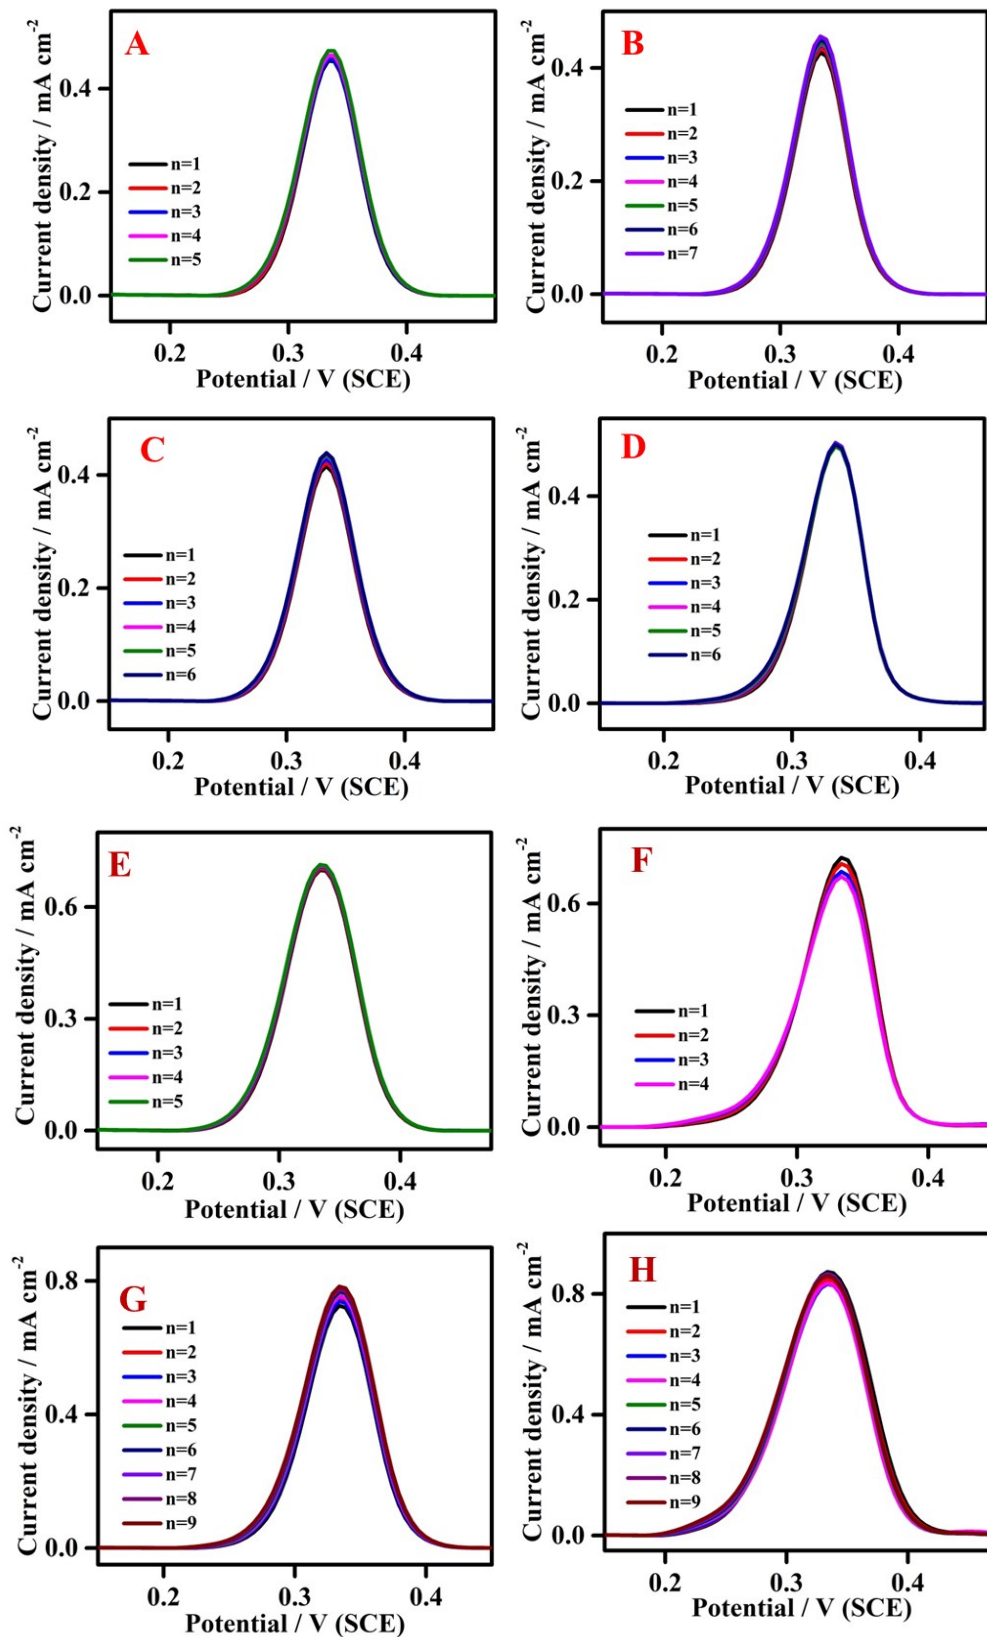

Figure S5. (A, B-Human serum 1; C, D-Human serum 2; E, F-Human serum 3 and G, H-Human serum 4) Real sample analysis human serum for the detection AC. DPV parameters:

Step potential=0.0050 V; Modulation amplitude=0.0250 V; Modulation time=0.20 sec and Interval time=0.5 sec.

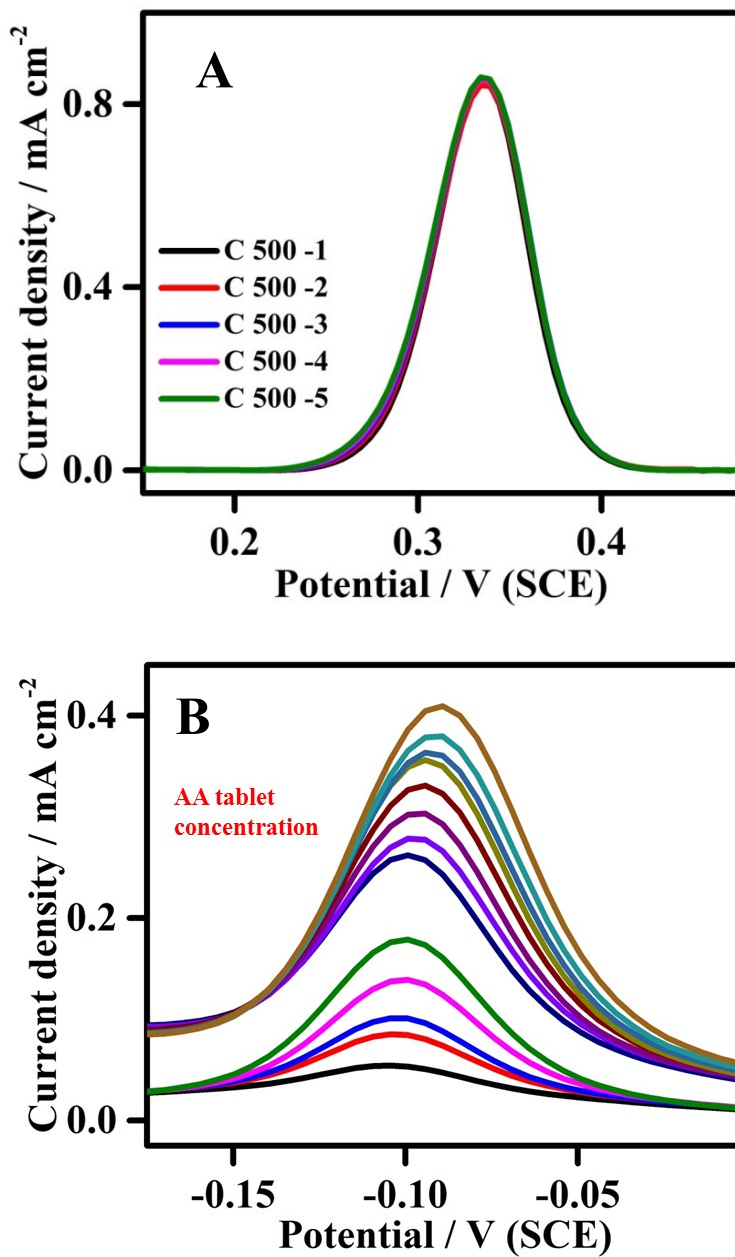

**Figure S6.** (A and B) Real sample analysis of PA and AA in pharmaceutical tablets.



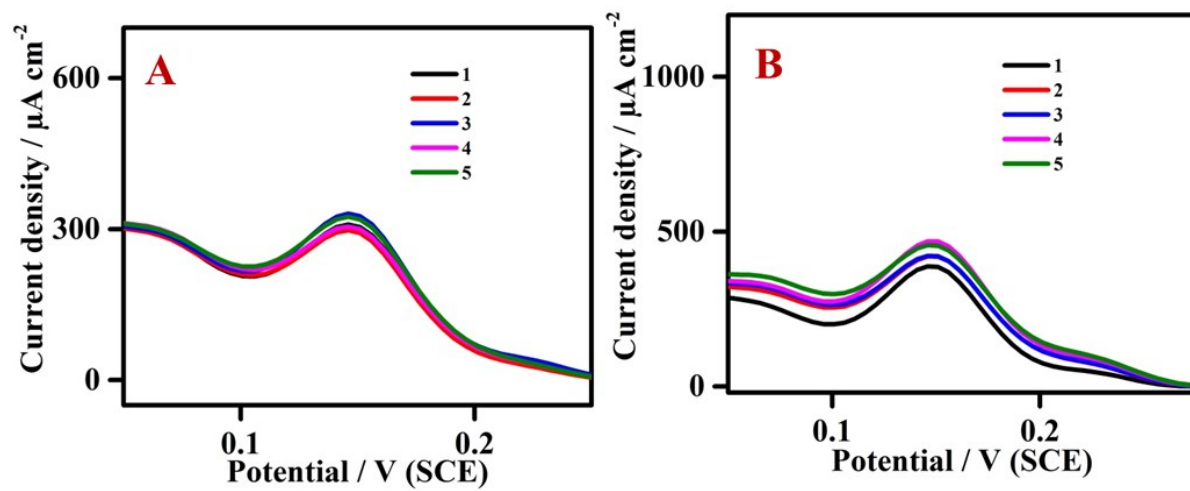

**Figure S7.** (A and B) Real sample analysis of DA by standard addition method.
